# Supplementary material for: Natural language processing for cognitive therapy: Extracting schemas from thought records
Source: PubMed Central journal article supplement (PMC8523074; doi:10.1371/journal.pone.0257832), 2021-10-18
Supplement: pone.0257832.s003.pdf [file pone.0257832.s003.pdf]

Table that summarizes the main outcomes of the five linear models that were fit to assess whether there is a link between schemas and outcomes on various mental health questionnaires.

| Schema                 | HDAS-D |         |      | HDAS-A |         |       | BDI-IA |         |       | CD-R  |         |        | CD-A  |         |        |
|------------------------|--------|---------|------|--------|---------|-------|--------|---------|-------|-------|---------|--------|-------|---------|--------|
|                        | b      | $\beta$ | p    | t      | $\beta$ | p     | b      | $\beta$ | p     | b     | $\beta$ | p      | b     | $\beta$ | p      |
| Attachment             | 0.06   | 0.01    | 0.81 | 0.24   | -0.03   | 0.61  | 0.29   | 0.03    | 0.63  | -0.13 | -0.01   | 0.83   | -0.39 | -0.03   | 0.56   |
| Competence             | -0.24  | -0.05   | 0.37 | -0.90  | -0.05   | 0.40  | -0.85  | -0.07   | 0.21  | 0.11  | 0.01    | 0.87   | 0.82  | 0.06    | 0.28   |
| Global self-evaluation | 0.31   | 0.09    | 0.12 | 1.56   | 0.18    | <0.01 | 1.25   | 0.15    | 0.013 | 2.11  | 0.24    | <0.001 | 2.06  | 0.21    | <0.001 |
| Health                 | 0.69   | 0.10    | 0.11 | 1.59   | 0.07    | 0.21  | 1.90   | 0.10    | 0.08  | 1.00  | 0.05    | 0.37   | 1.52  | 0.07    | 0.21   |
| Power and Control      | 0.92   | 0.11    | 0.06 | 1.86   | 0.10    | 0.07  | 1.39   | 0.06    | 0.27  | 3.44  | 0.15    | <0.01  | 2.31  | 0.09    | 0.10   |
| Meta-cognition         | 0.90   | 0.04    | 0.44 | 0.77   | 0.06    | 0.27  | 1.80   | 0.03    | 0.54  | -2.22 | -0.04   | 0.46   | -0.65 | -0.01   | 0.84   |
| Other people           | -0.24  | -0.01   | 0.83 | -0.21  | -0.04   | 0.50  | 0.56   | 0.01    | 0.85  | -2.24 | -0.04   | 0.45   | -2.96 | -0.05   | 0.36   |
| Hopeless               | -0.06  | -0.01   | 0.92 | -0.11  | 0.01    | 0.81  | 0.68   | 0.03    | 0.66  | 1.37  | 0.05    | 0.39   | 1.88  | 0.06    | 0.28   |
| Other's views on self  | -0.25  | -0.05   | 0.40 | -0.84  | 0.01    | 0.87  | -1.36  | -0.10   | 0.07  | 0.54  | 0.04    | 0.48   | -0.01 | -0.00   | 0.99   |

Abbreviations: HDAS-D – Hospital Depression and Anxiety Scale - Depression, HDAS-A – Hospital Depression and Anxiety Scale - Anxiety, BDI-IA – Beck Depression Inventory - I amended, CD-R – Cognitive Distortions - Relatedness, CD-A – Cognitive Distortions - Achievement, b – estimates for the regression coefficient,  $\beta$  – standardized estimates for the regression coefficient
